# Supplementary material
Source: publisher figshare collection journal article supplement (https://gsapubs.figshare.com/ndownloader/files/22399383)
Supplement: Supplementary file 1 [file 22399383]

## Sheet: Site 29 Organic C-isotopes
Site 29
Concentrated phytoclasts										Individually picked phytoclasts
Sample No	Weight/Vol	Beam Area	N (Sam)	Beam Area	C (Sam)	13C (Sam)	depth(m)			Sample No	Weight/Vol	Beam Area	N (Sam)	-------	Ratio 1	Ratio 2	Beam Area	C (Sam)	-------	13C (Sam)	depth
125-2993B	0.23	1.47155e-09	2.40187	2.66141e-08	78.1428	-24.1771	311.61						ug					ug		DeltaPDB
132-3040	1.13	2.0507e-09	10.0196	9.13024e-08	427.992	-25.7341	314.66			9-180W	24.3	2.26633e-09	1468.97	411.523	0.0070667	0.000279016	3.05164e-08	11397.8	411.523	-23.7309	355.55
137-3112	0.88	2.19742e-09	10.7585	9.9209e-08	469.618	-25.3235	320.21			8-260W	37	1.7863e-09	1131.07	270.27	0.0071419	0.000357117	3.63096e-08	13216.3	270.27	-26.6294	416.84
140-3115B	0.34	2.06439e-09	3.37088	4.29878e-08	125.965	-25.9857	322.12			3-277W	22	1.38923e-09	859.926	454.545	0.00708675	0.000243104	2.33744e-08	8296.79	454.545	-26.6858	431.43
142-3138	1.11	1.87983e-09	9.10603	9.75145e-08	440.014	-25.3819	323.96			7-300W	36	1.54056e-09	932.506	277.778	0.00712142	0.000346945	3.34142e-08	11573.2	277.778	-25.2025	452.61
145-3176	2.19	1.69201e-08	17.694	4.00012e-07	728.814	-26.1703	326.12			10-335W	27.9	1.65672e-09	981.184	358.423	0.00714611	0.000368018	3.07022e-08	10382.4	358.423	-23.7217	477.41
147-3178	1.91	3.43524e-09	16.6858	1.5155e-07	709.155	-25.9574	327.45			16-340W	22.9	1.01964e-09	591.203	436.681	0.00709671	0.000246929	1.97585e-08	6527.19	436.681	-26.4808	482.6
150-3218	1.91	1.22256e-08	15.6091	2.42148e-07	628.488	-25.6693	329.97			11-360W	24.8	1.439e-09	817.087	403.226	0.00708237	0.000280693	2.28852e-08	7389.4	403.226	-24.5611	500.71
152-3220	1.98	4.46305e-09	23.2653	1.78048e-07	900.054	-25.8734	331.38			4-385W	31.2	1.29935e-09	715.988	320.513	0.00711863	0.000317156	2.97428e-08	9448.2	320.513	-26.3457	519.81
155-3283	1.84	1.15065e-08	12.0691	2.40574e-07	443.764	-26.2691	333.72			6-427W	30.1	1.13202e-09	620.841	332.226	0.00714469	0.000321348	2.71211e-08	8641.48	332.226	-25.371	555.94
157-3318B1	0.48	1.38697e-09	6.82143	5.00114e-08	222.951	-26.4297	335.46			1-447W	26.3	1.14792e-09	626.66	380.228	0.00712	0.00023246	2.63707e-08	8427.9	380.228	-26.003	567.76
157-3318	2.12	5.18337e-09	25.2173	2.03255e-07	950.797	-26.0497	335.46			15-465W	35.7	1.4711e-09	799.324	280.112	0.00711666	0.00025216	3.34137e-08	10711.3	280.112	-27.0614	581.45
160-3323	2.06	2.33979e-08	24.4496	4.80064e-07	871.994	-25.8833	337.545			12-495W	28.4	1.6504e-09	892.532	352.113	0.00711143	0.0003101	2.66626e-08	8573.25	352.113	-24.4415	605.19
1598B	0.97	1.10126e-08	14.6789	1.93081e-07	490.203	-25.8343	337.89			13-185R1W	26.5	1.74441e-09	939.01	377.358	0.00711111	0.000305756	1.64172e-08	5295.05	377.358	-24.8073	666
165-3451B	2.01	1.31e-08	18.535	2.45e-07	733.562	-25.7874	341.44			14-204R1W	21.5	2.31113e-09	1238.34	465.116	0.00710546	0.000310902	2.26479e-08	7327.14	465.116	-22.4145	718
167-3453	2.02	4.26505e-09	20.4433	1.71426e-07	804.205	-25.4123	342.84
177-3538	0.98	1.49848e-09	7.27505	7.55583e-08	344.159	-25.6364	348.15
175-3535	2.19	1.31524e-08	13.6483	3.28811e-07	591.529	-25.5833	348.32			Bulk palynological residues
170-3527	2.12	1.38714e-08	14.239	3.34193e-07	596.992	-25.6149	350.49			Sample No	Weight/Vol	Beam Area	N (Sam)	Beam Area	C (Sam)	13C (Sam)	depth(m)
172-3529	2.12	3.67043e-09	19.4275	1.47689e-07	754.781	-25.777	351.98			209RCCUN	0.412	1.10793e-08	5.25624	2.82199e-07	169.62	-25.6629	734.89
180-2569	1.88	8.91127e-09	9.27429	1.91746e-07	345.561	-24.3748	355.55			210R2_78-79UN	0.346	9.75711e-09	4.62002	2.81865e-07	168.104	-26.2233	736.86
182-3598	0.91	2.06317e-09	9.9383	8.60213e-08	384.036	-24.7364	356.61			211RCCUN	0.329	9.63205e-09	4.55862	2.67824e-07	159.421	-25.9321	740.05
185-3625	1.91	1.09599e-08	11.2811	2.83647e-07	507.59	-25.1141	359.67			163RCCUN	0.428	6.32094e-09	2.99443	1.32187e-07	78.9893	-23.4172	608.86
187-3627	1.9	3.70848e-09	19.2904	1.69773e-07	859.01	-25.1893	361.41			130-3002UN	1.04	6.72664e-09	8.93491	6.60288	387.681	-25.4451	310.26
190-3655B	2.1	1.21e-08	17.4874	2.43e-07	749.647	-25.0502	363.45			135-3701UN	1.06	6.22666e-09	8.18918	6.36995	343.06	-26.1525	317.73
192-3657	2.17	4.51501e-09	22.0156	1.76879e-07	843.072	-26.0071	365.26			165-3451UN	2.08	1.41e-08	20.5022	6.60074	763.168	-25.4318	341.44
200-3771	1.9	1.75852e-08	18.4033	3.75195e-07	685.7	-26.3895	369.56			205-3781UN	1.95	1.5e-08	21.6746	6.44257	736.106	-25.7559	372.54
202-3775	2.14	4.86874e-09	23.1576	1.94665e-07	913.108	-26.2705	370.94			210-3815UN	1.92	1.75e-08	25.1277	6.63111	799.467	-25.2519	379.52
205-3781B	2.04	1.55e-08	22.7492	2.6e-07	817.855	-25.8982	372.54			235-4006UN	2.02	1.75e-08	24.9685	9.7346	729.733	-25.1922	397.75
207-3783	2.12	5.9106e-09	28.1233	2.22593e-07	1047.73	-25.8528	373.98			250-4136UN	1.99	1.65e-08	23.5391	5.66011	770.597	-25.3208	409.33
195-3756	1.9	2.1962e-08	22.6666	4.57505e-07	820.151	-25.5424	374.77			265-4242UN	2.14	1.89e-08	27.1879	5.13225	957.45	-26.0595	420.63
197-3759	0.98	2.21611e-09	10.8037	8.64831e-08	401.501	-24.9885	376.38			275-4464UN	2.08	1.81e-08	26.1118	5.63929	882.86	-25.8148	429.73
210-3815B	2.12	1.94e-08	27.3805	2.94e-07	880.489	-25.4714	379.52			285-4633UN	2.16	1.8e-08	25.843	7.81536	868.915	-25.8587	439.17
212-3842	2.08	5.07144e-09	24.0347	1.7607e-07	824.695	-26.0781	380.95			290-4639UN	2.04	1.53e-08	21.8477	6.5529	674.448	-25.5442	443.63
215-3845B	1.94	1.91e-08	27.3951	2.95e-07	894.643	-25.405	383.1			320-5179UN	1.08	9.19844e-09	12.0387	1.44559	404.234	-24.7029	464.13
1653	2.17	3.58771e-08	38.7549	6.13802e-07	1136.73	-25.2149	384			420-6319UN	2.13	1.51e-08	21.8434	5.74919	701.562	-23.7958	547.26
217-3870	2.03	5.67676e-09	29.2748	1.98784e-07	995.662	-25.6368	384.73			1914UN		3.0506e-09	4.37214	3.7569	129.236	-23.2088	618.81
220-3895B	2.14	2.16e-08	30.8531	3.06e-07	925.741	-24.8265	387.19			100-2842UN	1.2	1.83229e-09	8.839	3.306	337.564	-25.6297	280.86
222-3898	1.89	6.1742e-09	30.0601	1.91457e-07	910.463	-24.7356	388.79			102UN	1.11	9.79094e-10	4.73926	6.71842	130.3	-25.5416	282.41
225-3938B	2.19	2.16e-08	30.5647	3.04e-07	909.446	-24.7104	390.94			107-2896UN	0.9	1.56556e-09	7.53233	0.288174	277.078	-25.7099	291.91
227-3940	2.05	6.66157e-09	32.1851	2.14557e-07	1008.72	-25.2455	392.26			112UN	0.95	7.52283e-10	3.6382	9.36583	105.404	-25.1956	284.89
230-3977B	2.06	1.81e-08	29.8855	3.31e-07	916.973	-25.0346	394.63			122UN	0.47	7.07629e-10	3.56096	19.6169	94.6738	-25.1503	305.81
232-4003	2.17	5.97109e-09	28.9823	1.80959e-07	856.604	-24.7665	396.26			127UN	0.86	8.98905e-10	4.30705	-18.517	151.439	-24.5673	308.16
235-4006B	0.32	3.12258e-09	5.08844	4.83328e-08	142.484	-25.4054	397.75
237-4036	2.06	6.46079e-09	33.362	1.98477e-07	992.092	-25.0464	400.06
240-4063B	0.99	1.05279e-08	14.0116	1.66245e-07	420.891	-25.1684	402.32
242-4065	2.01	6.13941e-09	29.4364	2.0057e-07	945.831	-24.9532	403.8
245-4104B	1.96	2.01e-08	28.6359	3.08e-07	928.233	-25.1267	406.16
247-4106	2.03	6.16156e-09	29.8605	2.09908e-07	991.37	-24.9218	407.54
250-4136B	2.15	2.16e-08	30.6308	3.31e-07	990.074	-25.2101	409.33
252-4138	1.91	3.43535e-09	16.3105	1.14534e-07	536.852	-26.2917	410.81
255-4165B	1.99	1.02e-08	16.7464	2e-07	565.557	-26.214	413.02
257-4198	2.02	4.94674e-09	23.79	2.05464e-07	966.337	-25.8719	414.56
260-4201B	2.14	2.05e-08	29.6406	3.55e-07	1096.69	-25.8105	416.84
262-4226	1.87	5.33561e-09	29.3393	1.89059e-07	1009.09	-25.8782	418.62
1691	2.15	2.79951e-08	30.8969	4.34221e-07	968.611	-25.3697	420.49
265-4242B	1.93	1.66e-08	23.8079	2.77e-07	841.214	-25.9383	420.63
267-4278	1.97	6.37689e-09	30.6992	2.28007e-07	1071.42	-26.0157	423.6
270-4281B	1.93	1.58e-08	23.4157	2.52e-07	804.515	-25.8838	425.6
272-4402	2.03	6.16704e-09	29.8036	2.20088e-07	1030.85	-26.0439	427.61
275-4464B	1.94	1.78e-08	25.8393	2.96e-07	912.071	-25.9906	429.73
277-4481	2.12	5.41727e-09	29.1093	1.90993e-07	992.971	-25.9924	431.43
280-4558	1.96	2.39661e-08	25.0995	4.65894e-07	854.088	-25.9005	433.86
282-4560	2.02	6.3038e-09	30.5037	2.23714e-07	1054.17	-25.8484	435.31
285-4633B	0.34	2.96052e-09	4.34531	5.09563e-08	145.86	-25.7775	439.17
287-4636	2.17	6.36916e-09	30.2124	2.22905e-07	1044.44	-26.1078	441.9
292-4752	2.15	5.99645e-09	30.9556	2.00964e-07	1004.93	-25.2003	443.63
295-4837	1.92	1.83418e-08	18.9816	3.67898e-07	660.68	-25.0503	446.24
297-4843	1.87	5.30581e-09	25.7916	1.78024e-07	844.64	-24.7376	447.65
310-5129B	1	3.77666e-09	4.95264	6.12474e-08	152.408	-24.975	448.11
312-5131	2.08	4.27137e-09	20.6076	1.61624e-07	757.259	-25.3079	449.58
300-5005	2.05	1.5733e-08	16.4894	3.5111e-07	645.656	-24.9447	452.61
302-5066	2	3.50991e-09	18.7179	1.40283e-07	723.081	-25.3148	454.17
305-5070B	1.07	6.52238e-09	8.49204	1.39977e-07	345.956	-25.5227	455.92
1739	1.92	1.72825e-08	21.9954	3.34976e-07	857.564	-24.9193	460.49
315-5158B	2.15	1.19e-08	17.1342	2.17e-07	661.197	-25.4686	461.24
322-5208	1.96	4.05959e-09	21.1649	1.77873e-07	897.032	-25.2325	466.45
325-5211B	1.97	1.32e-08	21.6472	2.47e-07	679.113	-24.3375	468.66
332-5296	0.9	3.15615e-09	15.1955	9.1643e-08	409.943	-22.6931	474.76
335-5305B	1.09	1.02401e-08	13.2847	1.52153e-07	374.779	-23.1063	477.41
340-5414B	1.92	9.24e-09	14.1018	1.68e-07	559.599	-25.7262	482.6
342-5416	1.98	3.57415e-09	18.436	1.53384e-07	767.947	-25.6911	483.28
345-5443B	2	1.4e-08	20.8706	2.75e-07	805.886	-25.3566	486.16
350-5475B	2.15	1.53e-08	21.7416	2.67e-07	800.709	-25.5905	489.11
352B	1.02	2.12543e-09	10.2611	5.39125e-08	243.852	-24.2088	491.86
1777B	1.83	2.87e-08	46.9943	2.76e-07	750.167	-25.1536	496.45
355-5526B	1.04	4.00816e-09	5.32227	7.06423e-08	178.101	-24.6218	496.83
357B	0.9	2.01866e-09	9.75406	6.2786e-08	284.167	-24.1891	498.53
360-5553B	0.34	2.99894e-09	4.50868	4.22658e-08	122.109	-23.4705	500.71
362-5555	1.03	2.65878e-09	12.815	1.03146e-07	458.675	-24.6446	502.2
365-5590B	1.02	8.51402e-09	10.9806	1.52098e-07	372.426	-24.8135	504.28
370-5640B	1.08	8.84885e-09	11.6471	1.60103e-07	399.765	-24.1643	508.27
372-5659	1.2	3.23437e-09	15.5667	1.16734e-07	523.217	-24.3023	509.56
375-5662B	1.02	8.60164e-09	11.2395	1.58583e-07	393.275	-23.9033	511.11
377-5689	0.99	2.48657e-09	12.0197	9.62846e-08	430.439	-24.7876	512.98
380-5720B	0.98	8.21951e-09	10.6525	1.51568e-07	372.683	-24.16	515.14
382-5724	1.91	5.41976e-09	28.2493	1.89577e-07	960.627	-25.016	517.26
482-6827B1	0.27	8.0773e-10	3.99031	2.70733e-08	121.365	-24.9517	517.26
385-5746B	2.14	1.41e-08	19.9363	2.88e-07	862.168	-25.752	519.81
390-5806B	1.16	1.25161e-08	16.6703	2.13396e-07	541.021	-24.2017	522.3
392-5809	2.13	6.40375e-09	30.5403	2.02901e-07	957.205	-24.4062	523.7
395-5839B	1.01	8.10704e-09	10.7734	1.28184e-07	323.623	-24.6388	527.69
400-5873B	2	1.41e-08	20.4881	2.5e-07	771.351	-25.1727	531.93
402-5894	1.93	4.06189e-09	21.0111	1.48926e-07	744.916	-24.8948	533.35
405-5877B	2.07	1.4e-08	20.1835	2.23e-07	689.004	-25.3778	536.56
407-5979	2.08	4.31773e-09	22.2845	1.68199e-07	841.435	-25.0246	537.93
1820	1.98	2.48646e-08	26.7639	5.28077e-07	978.249	-24.9789	539.07
410-6079B	1.99	1.98e-08	28.5982	3.27e-07	1009.73	-24.3932	540.25
412-6081	2.09	5.17492e-09	24.5915	1.85631e-07	870.421	-25.6256	541.82
415-6283B	2.12	1.26e-08	20.6766	3.05e-07	833.935	-25.3942	543.53
417-6287	1.88	4.1263e-09	21.5151	1.62097e-07	816.504	-25.5573	545.13
420-6319B	0.39	2.54338e-09	4.14871	4.88354e-08	143.676	-24.5653	547.26
422-6350	2.08	4.91936e-09	23.9754	1.98997e-07	930.588	-24.1238	548.76
425-6353B	2.01	1.08e-08	17.7802	2.77e-07	763.49	-25.3867	551.11
427-6382	2.12	3.95732e-09	20.4414	1.63677e-07	817.806	-25.6882	555.94
430-6420B	1.99	9.31e-09	14.6466	2.13e-07	611.105	-25.6832	556.88
432-6460	2.02	4.56048e-09	21.7132	1.94964e-07	914.842	-25.2417	557.75
435-6487B	2.14	1.3e-08	20.7676	3.19e-07	908.417	-25.4651	561.26
437-6489	1.94	4.51286e-09	23.2859	1.83983e-07	920.772	-24.696	562.83
440-6525B	1.98	1.19e-08	17.2006	2.39e-07	735.858	-24.7434	564.65
442-6527	2.12	4.38615e-09	21.093	1.92681e-07	903.342	-25.3388	565.86
445-6554B	2.11	1.63e-08	23.2135	3.3e-07	991.928	-24.7714	567.01
447-6556	2.08	3.90939e-09	20.5391	1.74284e-07	883.193	-25.3027	567.76
450-6600B	1.97	1.18e-08	18.2281	3e-07	866.178	-25.7073	570.8
452-6602	1.92	4.24435e-09	20.3918	1.85e-07	870.862	-25.3938	572.01
455-6630B	1.95	1.4e-08	21.1523	2.58e-07	844.866	-24.9659	573.17
457-6632	2.09	3.98762e-09	21.5919	1.64903e-07	864.807	-25.877	574.68
460-6661B	2.03	1.55e-08	23.5429	3.37e-07	979.884	-25.7068	577.15
462-6663	2.1	6.35139e-09	30.1151	2.26848e-07	1064.16	-25.5985	578.6
465-6693B	2.14	1.26e-08	17.847	2.04e-07	610.972	-26.1649	581.45
1861	2.07	2.78039e-08	29.5127	4.84197e-07	897.973	-25.6958	582.19
467-6719	1.88	3.92572e-09	20.325	1.26485e-07	633.872	-25.4412	582.28
470-6722B	1	1.0112e-08	13.3578	1.56905e-07	393.128	-25.3326	584.55
472-6751	2.15	6.69418e-09	32.0329	2.05132e-07	962.637	-25.708	586.07
475-6779B	2.14	1.52e-08	22.1691	2.39e-07	703.719	-25.1725	588.36
477-6781	1.94	4.58203e-09	25.0004	1.61289e-07	853.299	-24.9634	589.11
480-6809B	2.06	1.03e-08	17.0952	2.45e-07	682.578	-25.5128	592.05
482-6827	2.05	4.73983e-09	22.8306	1.82292e-07	854.367	-25.1984	595.46
485-6855B	2.05	1.69e-08	25.2987	2.94e-07	950.905	-25.3619	597.55
487-6857	2.14	4.85574e-09	25.3112	1.78083e-07	901.306	-25.2823	599.12
490-6887B	1.08	1.05761e-08	14.0651	1.94156e-07	490.868	-25.2993	601.35
492-6889	1.92	5.13227e-09	24.4571	1.64706e-07	773.139	-26.0301	602.87
495-6906B	0.99	7.03354e-09	9.09253	1.13777e-07	279.306	-24.1092	605.19
497-6924	2.16	4.83012e-09	25.1009	1.61018e-07	813.146	-23.9272	606.96
163R1-B	2.07	7.68848e-09	45.8144	1.78092e-07	581.1	-24.2457	607
500-6927B	0.23	2.38985e-09	3.89184	3.73911e-08	110.451	-24.6725	609.22
168R1-B	1.92	7.1785e-09	42.2386	1.92039e-07	618.378	-25.181	623
175R2-B	2.18	8.54666e-09	49.4234	1.41598e-07	450.851	-23.2555	642
176R1-B	2.12	1.24901e-08	72.0129	2.21441e-07	704.477	-24.5193	645
180R1-B	2.1	1.18069e-08	70.9575	2.12589e-07	699.875	-23.953	653
1953	2.01	2.47121e-08	31.5231	3.99825e-07	1025.85	-24.031	657.64
182R2-B	1.94	1.14143e-08	66.8783	2.0979e-07	672.593	-24.4149	660
183R2-B	1.06	5.79272e-09	34.9357	8.27041e-08	262.808	-22.3024	663
184R-B	2.03	1.18926e-08	70.2686	1.72903e-07	559.206	-23.6942	665
185R1-B	2.2	1.86105e-09	10.6656	2.1697e-08	68.9089	-24.6109	666
189Rcc-B	1.2	7.4525e-09	44.4093	1.21171e-07	380.552	-23.6966	675
190R2-B	1.11	7.77809e-09	48.0179	1.17322e-07	379.211	-23.5766	678
194R2-B	1.02	8.02281e-09	48.6675	1.17833e-07	376.023	-23.0974	690
196R2-B	1.95	1.46379e-08	87.5964	1.97295e-07	646.629	-22.2547	696
197R2-B	0.98	6.39961e-09	39.0471	8.7744e-08	281.195	-22.6304	700
199R2-B	1.93	1.1574e-08	68.6757	1.5531e-07	504.528	-22.4722	706
201R1-B	2.08	1.80953e-08	104.953	2.20349e-07	702.188	-22.3855	711
202R2-B	0.94	7.58392e-09	45.1838	1.03813e-07	325.675	-23.6785	713
203R1-B	2.07	1.12687e-08	64.7784	1.51859e-07	482.708	-22.6908	715
204R1-B	0.9	6.5327e-09	38.9354	9.36887e-08	294.567	-21.9048	718
205Rcc-B	0.96	6.31188e-09	38.7374	9.73734e-08	313.388	-22.7957	721
207R3-B	0.98	3.33004e-09	19.836	4.04359e-08	126.712	-22.9719	727
209R1-B	1.12	3.62737e-09	21.5987	6.24705e-08	195.326	-26.5497	733
210R2-B	1.1	6.90677e-09	42.9023	1.01164e-07	328.394	-25.7397	736
168RCCB	0.96	1.55245e-08	6.55645	3.33276e-07	188.24	-23.6049	624.52
171RCCB	0.358	7.65565e-09	3.63387	1.48048e-07	89.161	-23.4194	633.14
175RCC-B	0.481	4.44214e-09	2.10832	9.9528e-08	59.3958	-23.6418	643.48
176RCCB	1.11	2.69282e-08	11.5134	7.31177e-07	417.922	-25.0283	644.12
183RCCB	0.97	2.22576e-08	9.54887	4.95059e-07	284.01	-23.6731	663.95
190R1_ 130-B	0.307	7.25149e-09	3.45319	2.01651e-07	120.885	-24.2461	677.92
195R2_ 33-35B	1.09	2.85196e-08	12.0892	6.18189e-07	350.223	-23.1724	693.7
195RCCB	0.512	1.27251e-08	6.03913	2.74917e-07	165.596	-23.4054	695.19
199RCCB	0.92	3.20283e-08	13.5514	7.68204e-07	434.553	-22.1609	707.07
202R1_ 107-108B	1.03	2.70544e-08	11.3839	5.8228e-07	327.89	-22.716	712.86
208RCCB	0.512	7.46845e-09	3.53976	1.86694e-07	111.778	-26.0486	730.51
209R1B	1.07	1.53425e-08	6.6047	3.51105e-07	202.173	-26.0778	731.67
212R1_ 38-B	0.382	1.00088e-08	4.78227	2.84139e-07	171.111	-24.4578	741.05
212RCC-B	0.492	1.5223e-08	7.26154	3.51846e-07	211.403	-24.7601	743.7
213R1_ 24-B	0.292	9.98043e-09	4.77683	2.23779e-07	135.069	-23.9516	743.96
214R1_ 51-53B	1.03	2.08029e-08	8.76941	5.48402e-07	309.279	-25.0514	747.28
215R2_ 146-B	0.385	1.19279e-08	5.67072	2.58607e-07	154.679	-23.7222	749.94
217RCCB	0.485	1.38658e-08	6.60635	3.08891e-07	186.47	-23.3722	756.22

## Sheet: Site 28 Organic C-isotopes
Site 28
Concentrated phytoclasts
Sample No	Weight/Vol	Beam Area	N (Sam)ug	Beam Area	C (Sam)ug	13C (Sam)DeltaPDB	depth(mbsf)
22-8124	1.71	1.69524e-08	17.7942	3.82966e-07	708.621	-26.5335	223.88
24-8126	1.92	4.44e-09	21.1347	1.74e-07	820.274	-26.1832	226.55
26-8175	1.95	2.20911e-08	23.3766	3.93099e-07	841.856	-26.1836	228.48
991	1.86	2.82609e-08	29.8931	5.35998e-07	994.322	-26.2622	229.55
30-8310	2.11	1.76164e-08	22.5784	2.77468e-07	715.085	-25.5854	232.95
31-8311	2.2	4.09264e-09	21.2479	1.49702e-07	754.549	-26.446	234.45
33-8375	2.07	6.33e-09	30.3695	2.06e-07	963.882	-26.3303	237.72
34-8492B	0.3	1.84384e-09	2.99975	2.84307e-08	84.1521	-26.0988	239.13
35-8493	0.98	2.71099e-09	13.1884	1.00732e-07	463.194	-26.0488	240.63
36-8540	2	5.36e-09	26.166	1.7e-07	796.744	-26.445	242.08
38-8542B	1.18	5.3536e-09	7.14147	8.95593e-08	227.698	-24.5921	244.72
39B	0.88	1.86538e-09	8.96953	7.05165e-08	318.101	-24.7797	245.94
41-8646	1.94	4.08e-09	19.3796	1.71e-07	804.609	-26.1857	248.55
42-8647	2.2	1.66911e-08	21.2417	3.25341e-07	844.019	-25.5704	250.05
43-8664	2.17	4.74912e-09	24.6347	1.97017e-07	991.125	-25.9752	251.77
46-8687	1.85	1.68455e-08	21.6366	3.06985e-07	792.921	-25.2487	254.23
53-8761	1.17	2.12892e-09	10.2581	8.89404e-08	396.285	-25.0697	269.51
54-8667	1.97	1.42322e-08	18.2886	2.16342e-07	562.037	-24.4519	284.57
28A-27RCC-B	1.03	3.2437e-08	13.7142	4.67289e-07	263.803	-23.5898	293.5
993	2.13	2.59045e-08	27.7872	5.52424e-07	1023.64	-24.3724	293.52
58-8925	1.94	1.94919e-08	24.9668	3.48686e-07	905.429	-23.6832	298.05
56-8916	1.93	4.36e-09	20.8789	1.63e-07	770.178	-24.2654	298.84
61-8944	1.89	3.22e-09	15.4135	1.19e-07	563.711	-24.3458	301.38
994	1.95	2.40903e-08	25.6605	4.81883e-07	893.43	-24.4385	302.5
62-9012	2.17	1.85048e-08	23.4005	3.28905e-07	852.468	-24.7067	303.26
995	2.08	1.82425e-08	23.3235	3.68507e-07	947.6	-24.6239	305.34
65-9029	1.92	4.1e-09	19.6583	1.76e-07	829.613	-25.0603	307.42
996	1.99	1.80365e-08	20.7992	3.28855e-07	765.416	-24.8718	308.49
66-9072	2.1	1.54132e-08	19.8428	3.01614e-07	780.792	-24.8801	308.78
68-9095	1.99	3.80044e-09	19.6893	1.71268e-07	859.947	-25.2683	311.88
70-9134	2.16	1.61408e-08	15.7802	2.76123e-07	547.598	-25.0514	314.6
71-9168	1.93	3.33e-09	15.7578	1.09e-07	508.536	-25.9291	318.37
72-9169	2.07	5.29066e-09	27.5722	1.77709e-07	901.564	-25.7158	319.95
28A-37RCC-B, 0-2cm	0.95	2.41243e-08	10.139	3.67992e-07	207.064	-26.5017	320.63
28A-37RCC-B	1	4.79681e-08	20.1516	4.85556e-07	273.712	-23.3943	320.69
74-9234	1.86	1.64622e-08	21.2226	2.6007e-07	675.955	-24.1596	322.46
86-9495	1.96	1.95776e-08	24.8358	3.13138e-07	811.98	-24.1711	323.87
92-9589	1.86	2.38e-09	11.3284	5.51e-08	259.014	-23.2865	332.51
997	2.05	2.43134e-08	24.8902	5.33997e-07	952.247	-24.6619	442.83
28A-91RCC-B	1.88	7.27252e-08	32.403	1.50898e-06	920.077	-24.8401	453.91
998	1.87	2.47651e-08	26.4718	5.0601e-07	937.898	-25.1784	458
999	2.03	2.45818e-08	31.2139	4.11581e-07	1051.36	-24.3004	470.23
1000	1.86	1.88183e-08	19.1255	3.21735e-07	662.561	-24.6948	482.53
28A-100RCC-B	1.1	5.96712e-08	25.3152	6.05937e-07	342.017	-23.4419	482.55
28A-104RCC-B, 0-3cm	2	3.39837e-08	15.0264	3.34324e-07	202.045	-23.9217	494.46
28A-110RCC-B, 0-2cm	2.18	2.5694e-08	11.3015	4.79905e-07	288.099	-26.8798	512.31
28A-110RCC-B	0.87	5.23079e-08	21.97	5.19235e-07	292.964	-23.647	512.72
28A-152R1-B, 2-3cm	2.35	3.2991e-08	14.5079	3.38059e-07	202.787	-25.8367	610.55
28A-152R1-B, 62-63cm	3.64	4.03873e-08	18.0869	4.46113e-07	273.638	-26.4802	611.15
28A-152R1-B, 82-83 cm	2.04	5.63651e-08	25.0494	5.56261e-07	338.164	-25.0766	611.35
28A-152R1-B, 112-113cm	1.02	3.30854e-08	13.9644	5.24702e-07	296.239	-27.8831	611.65
28A-152R1-B(142-143)	2.07	7.7609e-08	34.4033	1.097e-06	664.919	-27.2588	611.95
28A-152R2-B,12-13 cm	1.08	3.86963e-08	16.3048	4.79799e-07	270.912	-26.6481	612.16
28A-152R2-B, 151-153cm	1	2.45649e-08	10.4574	3.25779e-07	183.851	-26.4108	613.56
28A-152RCC-B	1.07	3.57376e-08	15.0167	3.48083e-07	196.04	-24.2448	613.56
28A-155RCC-B	0.92	5.92251e-08	24.8964	6.11268e-07	343.641	-24.6157	622.88
28A-167RCC-B	0.97	7.29227e-08	30.9902	8.59682e-07	485.199	-25.0961	659.51
28A-169RCC-B	1.93	5.66489e-08	25.3042	7.40401e-07	452.796	-22.8487	664.52
28A-170RCC-B	0.86	6.10772e-08	25.8673	5.88806e-07	332.376	-22.6419	668.65

## Sheet: Site 27 Organic C-isotopes
Site 27
Concentrated phytoclasts
Sample No	Weight/Vol	Beam Area	N (Sam)	Beam Area	C (Sam)	13C (Sam)	depth(mbsf)
			ug		ug	DeltaPDB
27A-66X1-B, 70-71cm	0.88	6.40887e-08	27.0821	7.14038e-07	402.073	-26.0653	195.56
27A-67X2-B, 68-70cm	1.89	8.64981e-08	38.0135	1.05232e-06	629.769	-26.4801	196.01
27A-67S2-B, 100-101cm	0.97	7.65934e-08	32.2532	9.18865e-07	515.24	-25.6154	196.37
27A-67XCC-B, 14-16cm	0.97	4.38486e-08	18.4366	7.00874e-07	393.658	-27.4099	200.96
27A-69XCC-B, 9-10cm	2.25	6.17491e-08	27.1484	6.0044e-07	359.898	-25.1853	207.06
27A-72SEC1-B, 14-15cm	0.86	3.89532e-08	16.4891	4.1391e-07	233.564	-25.1152	210.62
27A-72H1-B, 22-24cm	1.13	6.03998e-08	25.4011	6.57325e-07	368.865	-25.3189	210.7
27A-75X1-B, 50-52cm	1.85	1.11938e-07	49.1718	1.05658e-06	631.339	-23.579	216.72
27A-83R3-B, 11-12cm	1.12	6.88509e-08	29.0435	7.19298e-07	404.184	-24.77	237.62
27A-91RCC-B, 9-10cm	0.94	2.81332e-08	11.8572	6.74049e-07	378.359	-27.7546	261.96
27A-94R2-B, 100-101cm	0.98	2.52512e-08	10.6798	3.3889e-07	191.029	-25.3244	270.56
27A-94R3-B, 2-3cm	1.18	2.99336e-08	12.6381	6.59501e-07	370.973	-25.6143	271.06
27A-95R1-B, 109-111cm	2.15	9.49203e-08	41.7235	1.06345e-06	636.923	-25.7185	272.21
27A-101R1-B, 90-92cm	2.12	8.83357e-08	38.8126	1.15559e-06	691.037	-24.5061	292.46

## Sheet: Site 29 Foram C-isotopes
Single Sepcies
section	depth	CORE	SECTION	TOP_DEPTH	BOTTOM_DEPTH	MCD_TOP(m)	age(Ma)	D13C	MCD_TOP(m)
cc	0－2	81	1	102	104	369.58	12.7	2.967	369.58
2	89.5-91	89	2	89.5	91	395.355	13.0351	0.984	395.355
2	127－128	94	2	127	128.5	410.98	13.2382	1.312	410.98
1	128-131	95	1	128	131	412.54	13.2585	1.585	412.54
2	115－118	95	2	115	118	413.91	13.2763	0.982	413.91
2	130-131.5	108	2	130	131.5	450.66	13.754	0.864	450.66
1	130-131.5	109	1	130	131.5	452.21	13.7742	1.081	452.21
2	109-110.5	109	2	109	110.5	453.5	13.791	1.785	453.5
1	130-132	121	1	130	132	485.76	14.2103	2.597	485.76
1	130-131	122	1	130	131	488.81	14.25	1.099	488.81
2	75－76	122	2	130	131	490.32	14.2696	2.345	490.32
2	132-135	127	2	132	135	504.86	14.4586	1.28	504.86
1	120-121.5	132	1	120	121.5	519.21	14.6452	1.826	519.21
2	125－126	132	2	125	126.5	520.76	14.6653	0.702	520.76
2	118.5-120	133	2	118.5	120	523.655	14.703	0.907	523.655
2	51-52.5	136	2	51	52.5	529.48	14.7787	0.88	529.48
cc	14－16					530.21	14.7882	1.518	530.21
1	130－131.5	137	1	130	131.5	531.51	14.805	0.434	531.51
2	130－131.5	137	2	130	131.5	533.02	14.817	0.438	533.02
2	60－61.5	138	2	60	61.5	535.38	14.8563	1.022	535.38
2	123－126	141	2	123	126	545.14	15.019	0.554	545.14
1	130－133	142	1	130	133	546.76	15.046	-0.147	546.76
cc	8—10					548.51	15.0752	-0.295	548.51
1	130－133	143	1	130	132	549.81	15.0968	0.509	549.81
2	120－130	143	2	128	130	551.29	15.1215	0.595	551.29
1	45－49	144	1	45	49	552.01	15.1335	0.734	552.01
1	140－143	145	1	140	143	556.01	15.2002	0.871	556.01
1	127-128.5	146	1	127	128.5	556.33	15.2055	1.8726	556.33
2	36-38	147	2	36	38	559.53	15.2588	0.742	559.53
2	100－101.5	149	2	100	101.5	565.96	15.366	1.876	565.96
1	129.5－131	150	1	129.5	131	568.105	15.4017	1.391	568.105
2	149－151	150	2	129.5	131	569.605	15.4268	0.411	569.605
1	95－96.5	151	1	95	96.5	570.81	15.4468	0.486	570.81
2	96.5-98	151	2	96.5	98	572.025	15.4671	1.433	572.025
2	130-131.5	152	2	130	131.5	575.71	15.5285	2.2816	575.71
1	130-131.6	153	1	130	131.5	577.26	15.5543	0.622	577.26
cc	0－3					587.834	15.7306	0.868	587.834
2	131.5－133	156	2	131.5	133	587.965	15.7327	0.251	587.965
1	118－122	180	1	118	122	653.39	17.1094	-0.083	653.39
1	125-127	190	1	125.5	127	677.865	17.7933	-0.076	677.865
2	129-130.5	190	2	129	130.5	679.4	17.8362	1.186	679.4
1	110.5-112	191	1	110.5	112	680.765	17.8743	2.316	680.765
2	17－21	208	2	17	21	730.13	19.2536	-4.496	730.13

## Sheet: Site 29 Palynology
SEQUENCE	29A IODP NUMBER	SAMPLE NUMBER	Core	Section	DEPTH (mbsf)	RATIO Pollen versus Dinos	combined bisaccate pollen PERCENTAGES	ratio nonsaccate/bisaccate	ratio (conifer+DEMF)/(Swamp+Understorey)	Conifer Forest*	High-Altitude Forest*	Swamp Forest*	Deciduous-evergreen mixed forest (DEMF; incl. Oak and Hickory)*	Understorey plants*	Cyperaceae PERCENTAGES	Poaceae PERCENTAGES	Combined Sedges and Grasses PERCENTAGES	Spore PERCENTAGES	Percentages references sum: Sum of all pollen grains excluding bisaccate pollen
m4.1	3040	132	62	1	314.66	0.162544	19.7309	5.06818	10.5227	19.5067	0	3.58744	84.3049	6.27803	1.79372	0.44843	2.24215	0
m4.1	3112	137	64	1	320.21	0.125326	53.5398	1.86777	4.17742	53.9823	3.31858	17.2566	60.6195	10.177	2.65487	2.21239	4.86726	2.65487
m4.1	3318	157	69	1	335.46	0.0958084	43.578	2.29474	7.1	42.4312	2.06422	9.17431	71.5596	6.88073	3.66972	0.917431	4.58716	0.458716
m4.1	3323	160	69	2	337.545	0.0766551	23.7668	4.20755	3.40678	24.6637	3.13901	19.7309	65.4709	6.72646	3.58744	0.896861	4.4843	0.896861
m4.2	3569	180	76	1	355.55	0.104839	48.1395	2.07729	10.3846	45.5814	3.95349	9.76744	80	2.32558	1.39535	0	1.39535	0.930233
m4.3	3781	205	82	1	372.54	0.146718	13.8889	7.2	4.17778	14.3519	1.62037	10.1852	72.6852	10.6481	5.55556	0.462963	6.01852	1.38889
m4.4	3845	215	85	2	383.1	0.2	6.97674	14.3333	6.29032	7.90698	0.465116	7.44186	82.7907	6.97674	2.32558	0.465116	2.7907	0
m4.4	4036	237	92	1	400.06	0.37	12.5731	7.95349	6.4375	11.9883	2.33918	8.18713	78.3626	5.84795	2.92398	1.16959	4.09357	0.584795
m4.5	4165	255	95	2	413.02	0.202381	7.43243	13.4545	5.42647	6.53153	2.02703	9.45946	76.5766	5.85586	2.25225	0.900901	3.15315	0
m4.5	4201	260	96	2	416.84	0.102041	20.5357	4.86957	4.03	20.3125	0	11.1607	69.6429	11.1607	4.91071	0.892857	5.80357	0.892857
m4.5	4481	277	101	2	431.43	0.0701754	25.9259	3.85714	5.94286	25.463	0.925926	8.33333	70.8333	7.87037	4.16667	0	4.16667	1.38889
m4.5	5005	300	109	2	452.61	0.03125	36.0849	2.77124	9.92	35.3774	1.65094	8.01887	81.6038	3.77358	2.35849	0	2.35849	0
m4.5	5179	320	113	1	464.13	0.134048	47.9545	2.08531	18.25	48.6364	0.681818	4.09091	84.0909	3.18182	0.909091	0.454545	1.36364	0.454545
m4.5	5208	322	114	1	466.45	0.141491	99.3088	1.00696	9.06098	98.8479	0.921659	11.0599	72.3502	7.8341	1.84332	1.38249	3.22581	0.921659
m4.5	5305	335	117	2	477.41	0.0953608	49.3119	2.02791	11.6458	46.5596	0.917431	5.04587	81.6514	5.9633	2.29358	0.458716	2.75229	0.917431
m5	5416	342	120	2	483.28	0.199405	26.3485	3.79528	9.61111	25.9336	0.207469	5.80913	81.7427	5.39419	1.24481	0.829876	2.07469	0
m5	5553	360	126	1	500.71	0.18125	71.9027	1.39077	7.39286	66.1504	3.76106	13.2743	71.2389	5.30973	0.884956	0	0.884956	0.884956
m5.2	5659	372	129	1	509.56	0.172932	46.473	2.15179	6.77907	45.4357	0.207469	9.54357	75.5187	8.29876	4.14938	0.414938	4.56432	0.829876
m5.2	5724	382	131	2	517.26	0.261168	24.5413	4.07477	9.26	24.0826	0.917431	5.50459	82.1101	5.9633	2.75229	0.458716	3.21101	0.458716
m5.2	5746	385	132	2	519.81	0.181538	31.2775	3.19718	5.29545	29.5154	4.18502	9.69163	73.1278	9.69163	3.96476	0	3.96476	1.32159
m5.2	5894	402	138	1	533.35	0.12749	11.5741	8.64	5.72727	11.1111	0.925926	8.7963	76.3889	6.48148	3.7037	0	3.7037	0.462963
m5.2	5977	405	139	1	536.56	0.255319	21.789	4.58947	5.64474	21.789	0	11.0092	76.6055	6.42202	0.917431	0.917431	1.83486	0.458716
m5.2	5979	407	139	2	537.93	0.0496894	34.1743	2.92617	7.17647	35.7798	0.917431	11.4679	76.1468	4.12844	1.37615	0.458716	1.83486	0
m5.2	6382	427	145	1	555.94	0.0791367	19.9095	5.02273	6.84375	20.362	0.904977	8.1448	78.733	6.33484	1.80995	0.452489	2.26244	0.452489
m5.2	6600	450	151	1	570.8	0.123867	37.5566	2.66265	6.26923	37.3303	0.678733	13.5747	73.3032	4.0724	1.35747	0	1.35747	0.452489
m5.2	6693	465	154	2	581.45	0.382812	12.2066	8.19231	4.0122	13.3803	5.16432	10.3286	63.8498	8.92019	3.28638	0	3.28638	2.34742
m5.3	6906	495	162	2	605.19	0.0817439	53.6232	1.86486	7.79412	54.1063	2.17391	4.83092	73.913	11.5942	5.31401	0.966184	6.28019	5.31401
m5.3			168	1	624	0.169872	26.087	3.83333	11.4091	25.2174	0.434783	3.47826	83.913	6.08696	1.73913	0.434783	2.17391	0.869565
m5.3			175	2	642	0.123596	16.3507	6.11594	7.12069	16.3507	0	5.6872	81.5166	8.05687	2.8436	0.947867	3.79147	0.947867
m5.45			183	2	663	0.122807	19.3548	5.16667	7.75	18.894	0.460829	7.37327	81.106	5.52995	1.84332	0.460829	2.30415	0.460829
m5.45			185	1	666	0.0423077	13.785	7.25424	6.55	13.785	0	12.1495	78.0374	1.86916	0.46729	0	0.46729	0.934579
m5.6			196	2	696	0.231405	40.566	2.46512	11.4333	21.6981	0	3.77358	86.1635	5.66038	2.51572	0	2.51572	0
m5.7			204	1	718	0.227273	13.1222	7.62069	6.13636	12.4434	0.452489	9.50226	79.1855	5.42986	2.26244	0.904977	3.16742	1.35747
m5.8			207	3	727	0.0458333	8.53081	11.7222	7.48077	8.29384	0.236967	6.16114	83.8863	6.16114	1.4218	0	1.4218	0.947867
m5.8			209	1	733	0.222816	101.984	0.980545	16.9259	115.476	2.38095	5.55556	65.873	5.15873	1.5873	0	1.5873	5.15873
																			*following e.g. Larson et al. 2011, Miocene climate evolution of northern Europe: A palynological investigation from Denmark, Palaeogeography, Palaeoclimatology, Palaeoecology 309, 161–175

## Sheet: Bulk d13C, HI, CN, Tmax
Site 27A							Site 28A							Site 29A
Depth	HI	d13C_org	C/N	alpha	new d13C_terr		Depth	d13C_org	C/N	alpha	new d13C corr.			Depth	HI	d13C_org	C/N	alpha	new d13C corr.	Tmax
mbsf				26	-24.5		mbsf			26	-24.5			mbsf				26	-24.5
From CJB_samplesList…				44	-25					44	-24.9							44	-24.9
215.26	148.394	-23.613	27.1439	-0.0277778	-24.0812		233.06	-25.5276	20.3222	-0.0222222	-26.0538			332.7	120.952	-25.9484	26.0061	-0.0222222	-26.3482	426.2
218.36	108.688	-25.0925	26.3635	-0.0277778	-25.5824		236.45	-25.5016	16.2113	-0.0222222	-26.1192			337.29	119.927	-25.2782	20.6223	-0.0222222	-25.7977	428.4
218.86	88.9233	-24.8008	22.9133	-0.0277778	-25.3865		245	-23.3749	#N/A	-0.0222222	#N/A			341.01	103.685	-23.9406	16.2347	-0.0222222	-24.5576	414.6
221.35	#N/A	-24.1558	23.5681	-0.0277778	-24.7234		246.51	-25.3137	#N/A	-0.0222222	#N/A			341.56	141.508	-25.2518	27.0187	-0.0222222	-25.6292	422.4
223.06	175.136	-23.7542	24.2361	-0.0277778	-24.3032		248.23	-25.8446	37.7825	-0.0222222	-25.9828			342.06	128.581	-25.4504	30.1141	-0.0222222	-25.759	421.2
225.55	#N/A	-23.531	25.1822	-0.0277778	-24.0537		253.44	-25.6788	28.7578	-0.0222222	-26.0175			342.96	113.59	-24.953	30.1787	-0.0222222	-25.2601	422.7
228.93	143.673	-24.7498	28.9257	-0.0277778	-25.1686		254.02	-25.5015	29.8321	-0.0222222	-25.8163			343.46	54.567	#N/A	#N/A	-0.0222222	#N/A	420.4
230.01	112.947	-24.7784	0	-0.0277778	-26.0006		254.22	-25.4066	29.172	-0.0222222	-25.7361			343.65	68.6106	#N/A	#N/A	-0.0222222	#N/A	420.8
232.07	#N/A	-25.2618	#N/A	-0.0277778	#N/A		263.58	#N/A	#N/A	-0.0222222	#N/A			348.47	54.4151	-25.4612	#N/A	-0.0222222	#N/A	417.2
234.69	59.0463	-23.847	#N/A	-0.0277778	#N/A		266.05	#N/A	#N/A	-0.0222222	#N/A			351.82	106.084	-25.4635	27.6104	-0.0222222	-25.8277	415.6
236.35	63.5725	-25.5255	19.8379	-0.0277778	-26.1967		269.89	-24.3298	41.7748	-0.0222222	-24.3793			354.95	47.032	-27.201	#N/A	-0.0222222	#N/A	414.8
239.03	86.5663	-25.0195	18.1516	-0.0277778	-25.7375		275.15	-24.4916	26.7635	-0.0222222	-24.8746			364.2	177.607	-24.2861	30.2876	-0.0222222	-24.5908	424.3
245.61	#N/A	-23.9805	23.1867	-0.0277778	-24.5586		278.62	#N/A	#N/A	-0.0222222	#N/A			370.345	139.497	-25.8262	24.3265	-0.0222222	-26.2634	425.1
251.91	159.394	-25.4445	43.2145	-0.0277778	-25.4663		284.65	-24.9785	18.8185	-0.0222222	-25.5381			372.31	133.548	-25.3773	30.4138	-0.0222222	-25.6792	421.8
254.9	160.627	-25.0372	26.0633	-0.0277778	-25.5355		291.17	-24.3463	30.455	-0.0222222	-24.6472			376.48	127.805	-24.5066	23.5719	-0.0222222	-24.9605	419.4
259.73	178.701	-24.8583	30.522	-0.0277778	-25.2327		300.07	-23.8867	28.1054	-0.0222222	-24.2399			381.67	158.749	-25.2813	22.0714	-0.0222222	-25.7686	427.4
263.11	217.28	-24.8377	32.7305	-0.0277778	-25.1507		309.05	-24.571	26.1846	-0.0222222	-24.9669			390.3	151.487	-24.8254	21.5478	-0.0222222	-25.3244	429.2
270.6	221.623	-25.3827	34.9463	-0.0277778	-25.6342		312.36	-24.4164	34.5101	-0.0222222	-24.6272			393.26	146.349	-24.9823	18.7539	-0.0222222	-25.5434	431.4
271.43	189.825	-25.0296	0	-0.0277778	-26.2518		312.88	-23.8041	29.4701	-0.0222222	-24.127			396.81	168.537	-24.9141	20.407	-0.0222222	-25.4384	431
271.66	138.444	-24.5617	35.0606	-0.0277778	-24.81		313.46	-23.5583	20.0706	-0.0222222	-24.09			405.55	165.895	-24.9863	23.3518	-0.0222222	-25.4451	427.8
272.24	129.403	-25.4902	32.6422	-0.0277778	-25.8057		314.62	-25.1201	25.0385	-0.0222222	-25.5415			413.01	#N/A	-25.8086	21.0452	-0.0222222	-26.3187	#N/A
277.4	151.183	-25.4725	36.8267	-0.0277778	-25.6718		319.78	-24.8476	20.7124	-0.0222222	-25.3651			416.11	156.561	-25.5849	30.0405	-0.0222222	-25.8951	424.3
285.4	167.606	-25.1393	34.4019	-0.0277778	-25.4059		321.47	-23.8192	32.133	-0.0222222	-24.0829			419.29	132.069	-25.4788	26.7247	-0.0222222	-25.8627	425.5
291.52	122.755	-24.8833	10.0767	-0.0277778	-25.8256		326.57	-24.9431	#N/A	-0.0222222	#N/A			423.74	140.089	-25.7945	26.9313	-0.0222222	-26.1738	428
294.01	143.461	-24.3911	24.5281	-0.0277778	-24.932		332.26	-24.5211	#N/A	-0.0222222	#N/A			434.57	159.437	-25.4334	24.4553	-0.0222222	-25.8677	428.6
294.51	143.682	-24.5932	23.5915	-0.0277778	-25.1601		343.56	-24.7712	#N/A	-0.0222222	#N/A			442.14	152.676	-25.2975	23.3439	-0.0222222	-25.7566	426.1
295.71	65.56	-25.6921	18.2906	-0.0277778	-26.4062		345.76	-25.396	#N/A	-0.0222222	#N/A			448.11	159.569	-23.7495	19.6057	-0.0222222	-24.2916	423.9
330.93	112.72	-25.2923	0	-0.0277778	-26.5145		355.71	-23.3508	#N/A	-0.0222222	#N/A			449.21	160.703	-24.2406	26.5502	-0.0222222	-24.6283	422.2
331.92	80.9295	-25.3297	22.9117	-0.0277778	-25.9155		363.98	#N/A	#N/A	-0.0222222	#N/A			454.47	173.913	-24.6005	28.5486	-0.0222222	-24.9438	420
335.3	30.7167	#N/A	#N/A	-0.0277778	#N/A		382.93	-25.5934	#N/A	-0.0222222	#N/A			461.02	139.757	-24.9428	28.2935	-0.0222222	-25.2919	418.1
335.82	28.7635	-26.3335	#N/A	-0.0277778	#N/A		388.89	-24.4857	#N/A	-0.0222222	#N/A			466.99	185.291	-24.3013	36.2292	-0.0222222	-24.474	420
336.31	50.799	-26.0272	#N/A	-0.0277778	#N/A		391.35	-23.4577	#N/A	-0.0222222	#N/A			472.73	79.938	-24.2465	#N/A	-0.0222222	#N/A	419.8
337.11	67.1846	-25.0066	#N/A	-0.0277778	#N/A		407.07	#N/A	#N/A	-0.0222222	#N/A			477.87	170.577	-24.1101	28.2256	-0.0222222	-24.4607	417.9
340.43	30.9942	-23.5621	#N/A	-0.0277778	#N/A		421.66	-24.7228	37.9401	-0.0222222	-24.8575			478.51	200.786	-24.9535	27.0633	-0.0222222	-25.3298	419.5
							434.1	-24.8872	#N/A	-0.0222222	#N/A			482.17	167.74	-24.8924	29.241	-0.0222222	-25.2204	418.8
							443.42	-24.4014	33.8728	-0.0222222	-24.6265			486.15	224.712	-24.3725	20.1651	-0.0222222	-24.9021	421
							452.68	-24.7206	31.0197	-0.0222222	-25.009			489.59	98.7433	-24.6214	24.0544	-0.0222222	-25.0647	414.9
							458.69	-24.5391	30.0355	-0.0222222	-24.8494			494.21	107.741	#N/A	#N/A	-0.0222222	#N/A	418.4
							461.69	-24.8358	30.3374	-0.0222222	-25.1394			501.93	216.959	-23.7358	29.9821	-0.0222222	-24.0473	419.8
							467.78	-24.7543	30.3659	-0.0222222	-25.0573			503.85	233.725	-24.0294	30.6663	-0.0222222	-24.3257	420.2
							473.57	-23.6651	26.2829	-0.0222222	-24.0588			512.92	222.378	-23.6603	27.9474	-0.0222222	-24.017	420
							480.91	-24.5992	27.339	-0.0222222	-24.9695			521.81	235.706	-23.6898	25.2918	-0.0222222	-24.1056	424.6
							490.26	-24.8308	26.1516	-0.0222222	-25.2274			530.54	187.982	-24.4307	26.8689	-0.0222222	-24.8114	424.9
							495.12	-24.9198	30.1717	-0.0222222	-25.2271			537.91	#N/A	-25.096	#N/A	-0.0222222	#N/A	#N/A
							495.62	-25.0543	36.9598	-0.0222222	-25.2108			540.57	168.549	-24.7831	32.7548	-0.0222222	-25.033	420.9
							499.01	-24.5092	34.2819	-0.0222222	-24.7252			546.46	170.2	-23.5561	26.5696	-0.0222222	-23.9435	422.8
							505.47	-24.5857	33.7995	-0.0222222	-24.8124			549.36	259.335	-23.5633	32.12	-0.0222222	-23.8273	419.5
							510.52	-25.9039	32.5097	-0.0222222	-26.1592			558.33	220.654	-24.2239	37.9974	-0.0222222	-24.3573	419.7
							512.295	-25.3271	27.7821	-0.0222222	-25.6875			564.245	158.525	#N/A	#N/A	-0.0222222	#N/A	416.9
							513.53	-26.0876	31.6957	-0.0222222	-26.361			567.52	203.307	-24.6331	37.5317	-0.0222222	-24.7768	419.3
							516.77	#N/A	#N/A	-0.0222222	#N/A			570.31	199.582	-25.0379	39.4545	-0.0222222	-25.1389	420.4
														576.76	197.895	-25.1104	34.5207	-0.0222222	-25.3211	421.1
														580.95	129.092	#N/A	#N/A	-0.0222222	#N/A	419.6
														585.65	140.089	-24.7288	21.5769	-0.0222222	-25.2271	426.6
														588.68	171.121	#N/A	#N/A	-0.0222222	#N/A	424.1
														592.01	209.271	-24.5125	30.6229	-0.0222222	-24.8098	426
														595.45	186.557	-24.9788	30.0511	-0.0222222	-25.2888	424.4
														597.49	328.464	-24.9007	30.5014	-0.0222222	-25.2007	450.3
														600.65	161.718	#N/A	#N/A	-0.0222222	#N/A	422.7
														601.78	156.375	-24.5556	28.5493	-0.0222222	-24.899	421.3
														602.2	96.83	-24.8176	25.5293	-0.0222222	-25.228	423.6
														602.81	#N/A	-25.1164	28.5531	-0.0222222	-25.4597	#N/A
														603.96	#N/A	-24.1818	18.8749	-0.0222222	-24.7401	#N/A
														607.3	#N/A	-23.2783	24.2992	-0.0222222	-23.7161	#N/A
														612.37	148.446	#N/A	#N/A	-0.0222222	#N/A	417.9
														615.17	101.852	-22.5246	24.0553	-0.0222222	-22.9678	423.3
														620.03	33.3079	#N/A	#N/A	-0.0222222	#N/A	419.1
														621.65	284.718	-24.268	33.5177	-0.0222222	-24.5009	424.7
														624.01	57.2505	-24.1437	24.3682	-0.0222222	-24.5799	421.7
														629.82	41.9829	#N/A	#N/A	-0.0222222	#N/A	415.3
														632.93	129.774	-23.234	#N/A	-0.0222222	#N/A	422.3
														635.515	47.3675	-23.5738	19.0605	-0.0222222	-24.128	423.3
														639.16	47.7362	#N/A	#N/A	-0.0222222	#N/A	413.1
														641.29	171.239	-22.9406	26.1003	-0.0222222	-23.3384	418.9
														642.42	287.091	-23.0669	26.46	-0.0222222	-23.4567	419.8
														643.69	#N/A	-23.7203	29.2008	-0.0222222	-24.0492	#N/A
														649.75	277.451	#N/A	#N/A	-0.0222222	#N/A	422.8
														649.97	59.5138	-23.3268	21.593	-0.0222222	-23.8247	420.5
														650.55	208.862	#N/A	#N/A	-0.0222222	#N/A	419.2
														653.79	266.294	#N/A	#N/A	-0.0222222	#N/A	420.5
														656.91	265.427	-24.2363	29.6722	-0.0222222	-24.5547	423.2
														659.91	261.795	-23.6293	26.1202	-0.0222222	-24.0266	421.9
														661.95	253.792	-23.4636	27.2136	-0.0222222	-23.8366	421.7
														665.62	132.024	-23.4182	28.2702	-0.0222222	-23.7677	421.7
														666.87	42.7654	#N/A	#N/A	-0.0222222	#N/A	420.3
														668.22	37.4766	-24.1122	#N/A	-0.0222222	#N/A	424.5
														671.65	37.139	#N/A	#N/A	-0.0222222	#N/A	419.1
														671.97	41.0426	-23.5755	#N/A	-0.0222222	#N/A	423
														673.62	66.655	#N/A	#N/A	-0.0222222	#N/A	417
														677.2	291.424	-23.6776	25.5071	-0.0222222	-24.0886	420.5
